# Supplementary material for: Application of Nanopore Sequencing for High Throughput Genotyping in Horses
Source: MDPI journal article supplement (doi:10.3390/ani13132227), 2023-07-06
Supplement: s1 [file s1]

Table S2. Basic statistics for the initially filtered sequence variants.

| Chromosome     | Number of variants | Total Quality | Total depth at variant | Average distance (bp) |
|----------------|--------------------|---------------|------------------------|-----------------------|
| 1              | 1,975              | 4,485         | 1,416                  | 95,141                |
| 2              | 1,213              | 3,341         | 972                    | 99,854                |
| 3              | 1,261              | 4,252         | 1,337                  | 95,514                |
| 4              | 1,356              | 4,389         | 1,443                  | 80,653                |
| 5              | 1,120              | 3,904         | 1,181                  | 86,319                |
| 6              | 912                | 4,387         | 1,388                  | 95,340                |
| 7              | 1,070              | 4,026         | 1,210                  | 92,299                |
| 8              | 1,053              | 5,024         | 1,375                  | 90,127                |
| 9              | 1,047              | 4,698         | 1,414                  | 81,625                |
| 10             | 893                | 3,356         | 960                    | 95,037                |
| 11             | 423                | 3,609         | 1,167                  | 141,927               |
| 12             | 471                | 2,459         | 653                    | 77,616                |
| 13             | 618                | 12,705        | 1,725                  | 69,534                |
| 14             | 1,063              | 3,235         | 1,023                  | 89,035                |
| 15             | 1,037              | 4,645         | 1,223                  | 89,214                |
| 16             | 973                | 3,831         | 1,192                  | 91,422                |
| 17             | 917                | 4,342         | 1,332                  | 87,959                |
| 18             | 917                | 4,951         | 1,509                  | 90,076                |
| 19             | 735                | 3,794         | 1,061                  | 84,530                |
| 20             | 991                | 4,398         | 1,018                  | 65,206                |
| 21             | 732                | 4,825         | 1,271                  | 80,437                |
| 22             | 495                | 3,767         | 1,075                  | 99,800                |
| 23             | 621                | 6,491         | 1,458                  | 89,185                |
| 24             | 527                | 5,577         | 1,674                  | 91,308                |
| 25             | 380                | 6,843         | 1,592                  | 104,783               |
| 26             | 478                | 4,667         | 1,251                  | 88,942                |
| 27             | 484                | 4,006         | 1,196                  | 82,177                |
| 28             | 428                | 3,143         | 1,100                  | 108,507               |
| 29             | 506                | 6,698         | 1,735                  | 68,503                |
| 30             | 382                | 4,146         | 1,217                  | 80,300                |
| 31             | 280                | 3,038         | 1,126                  | 92,072                |
| X              | 943                | 3,682         | 1,022                  | 134,952               |
| Contig         | 2,115              | 6,601         | 1,471                  | NA                    |
| MT             | 10                 | 3,095         | 607                    | NA                    |
| All (sum/mean) | 28,426             | 4,646         | 1,277                  | 90,903                |
