# Supplementary material for: Application of Nanopore Sequencing for High Throughput Genotyping in Horses
Source: MDPI journal article supplement (doi:10.3390/ani13132227), 2023-07-06
Supplement: s1 [file s1]

Table S1. Number of raw and filtered reads generated per sample along with basic read statistics.

| Sample ID | Raw reads (K) | Filtered reads (K) | Total bases after filtering (M) | Q20 Bases (%) | Q30 bases (%) | Mean length after filtering (bp) |
|-----------|---------------|--------------------|---------------------------------|---------------|---------------|----------------------------------|
| D1        | 340.1         | 301.1              | 117.8                           | 66.8          | 15.8          | 391.0                            |
| D2        | 330.6         | 290.4              | 134.1                           | 62.8          | 14.3          | 380.0                            |
| D3        | 661.2         | 585.2              | 218.3                           | 62.9          | 13.7          | 373.0                            |
| D4        | 416.4         | 364.5              | 155.1                           | 65.9          | 15.0          | 425.0                            |
| D5        | 405.9         | 358.5              | 146.7                           | 62.7          | 13.4          | 409.0                            |
| D6        | 335.3         | 297.3              | 124.8                           | 66.5          | 15.1          | 419.0                            |
| D7        | 201.8         | 177.5              | 70.4                            | 66.2          | 15.1          | 396.0                            |
| D8        | 383.8         | 337.4              | 163.5                           | 65.6          | 15.1          | 484.0                            |
| D9        | 430.5         | 382.3              | 162.2                           | 66.1          | 14.8          | 424.0                            |
| D10       | 322.6         | 282.6              | 110.5                           | 66.1          | 14.7          | 391.0                            |
| D11       | 169.8         | 149.4              | 66.8                            | 66.7          | 14.3          | 446.0                            |
| D12       | 241.7         | 212.0              | 96.2                            | 66.1          | 13.8          | 454.0                            |
| D13       | 237.3         | 205.9              | 69.5                            | 65.7          | 16.4          | 337.0                            |
| D14       | 289.5         | 248.3              | 94.8                            | 65.2          | 16.5          | 381.0                            |
| D15       | 230.9         | 199.0              | 72.1                            | 65.4          | 15.9          | 362.0                            |
| D16       | 360.9         | 305.2              | 110.9                           | 64.9          | 16.3          | 363.0                            |
| D17       | 144.7         | 123.6              | 48.1                            | 64.4          | 14.8          | 389.0                            |
| D18       | 118.2         | 102.6              | 37.1                            | 65.3          | 15.6          | 361.0                            |
| D19       | 269.9         | 230.4              | 88.3                            | 64.7          | 15.6          | 383.0                            |
| D20       | 179.3         | 154.2              | 52.4                            | 65.2          | 15.5          | 340.0                            |
| D21       | 242.7         | 208.3              | 86.5                            | 65.0          | 15.9          | 415.0                            |
| D22       | 123.2         | 104.2              | 36.0                            | 64.7          | 15.9          | 345.0                            |
| D23       | 15.1          | 12.6               | 4.5                             | 65.2          | 15.9          | 358.0                            |
| D24       | 237.8         | 199.7              | 72.4                            | 64.6          | 15.7          | 362.0                            |
| D25       | 956.8         | 851.2              | 302.2                           | 66.3          | 13.2          | 355.0                            |
| D26       | 867.3         | 765.6              | 315.2                           | 66.1          | 14.0          | 411.0                            |
| D27       | 613.4         | 546.9              | 212.5                           | 66.4          | 13.6          | 388.0                            |
| D28       | 746.9         | 665.9              | 273.6                           | 66.4          | 13.6          | 410.0                            |
| D29       | 743.8         | 660.5              | 272.1                           | 66.3          | 13.9          | 411.0                            |
| D30       | 699.6         | 626.5              | 229.1                           | 66.6          | 13.9          | 365.0                            |
| D31       | 694.8         | 620.3              | 294.0                           | 66.2          | 13.8          | 473.0                            |
| D32       | 885.5         | 785.9              | 287.4                           | 66.4          | 13.9          | 365.0                            |
| D33       | 1030.7        | 908.1              | 351.5                           | 66.3          | 13.6          | 387.0                            |
| D45       | 126.8         | 104.0              | 42.1                            | 63.0          | 13.3          | 405.0                            |
| D46       | 353.0         | 288.4              | 124.1                           | 63.0          | 13.6          | 430.0                            |
| D47       | 638.1         | 526.0              | 235.6                           | 63.2          | 13.2          | 447.0                            |
| D48       | 1046.5        | 852.3              | 423.6                           | 62.9          | 13.7          | 497.0                            |
| D49       | 213.9         | 176.3              | 63.2                            | 63.0          | 12.7          | 358.0                            |
| D50       | 459.3         | 377.5              | 166.7                           | 62.9          | 13.0          | 441.0                            |
| D51       | 681.8         | 554.5              | 276.8                           | 62.8          | 13.2          | 499.0                            |
| D52       | 538.3         | 443.6              | 208.4                           | 62.9          | 13.0          | 469.0                            |
| D53       | 376.6         | 313.7              | 130.8                           | 63.2          | 13.4          | 417.0                            |
| D54       | 340.4         | 275.9              | 133.5                           | 62.7          | 13.0          | 483.0                            |
| D58       | 558.0         | 489.3              | 192.5                           | 65.4          | 13.4          | 393.0                            |
| D59       | 505.6         | 441.4              | 175.7                           | 65.3          | 13.6          | 398.0                            |
| D60       | 350.4         | 308.0              | 119.7                           | 65.5          | 13.0          | 388.0                            |
| D61       | 318.4         | 276.5              | 116.7                           | 65.0          | 13.5          | 422.0                            |
| D62       | 360.7         | 316.4              | 133.7                           | 65.3          | 13.1          | 422.0                            |

|            |       |       |       |      |      |       |
|------------|-------|-------|-------|------|------|-------|
| D81        | 471.2 | 413.7 | 173.8 | 65.3 | 13.1 | 420.0 |
| D83        | 437.9 | 380.6 | 154.9 | 65.1 | 13.2 | 407.0 |
| D84        | 319.9 | 281.9 | 111.7 | 65.4 | 13.4 | 396.0 |
| D88        | 650.8 | 528.9 | 259.3 | 63.0 | 13.0 | 490.0 |
| D89        | 732.6 | 591.0 | 268.5 | 62.4 | 12.6 | 454.0 |
| All (mean) | 449.9 | 388.3 | 161.2 | 64.8 | 14.2 | 408.3 |
